# Supplementary material for: On the outside, looking in: A Focus Groups Study Exploring the Experience of Caring for a Loved One with Anhedonia
Source: Research Square preprint supplement (doi:10.21203/rs.3.rs-8228916/v1), 2026-01-30
Supplement: Supplementary file 1 [file be9bf2e907d2705a13793338.docx]

**Supplementary Material**

**Table 1: Additional Quotes Supporting Generated Themes.**

| **Theme** | **Description** | **Illustrative Quotes** |
| --- | --- | --- |
| **Emotional detachment / loss of enjoyment** | Loved ones experience flat affect, emotional numbness | “He will explain, ‘Mum, I just, I don't feel anything.’ He doesn't, he doesn't feel joy, but he also doesn't feel sadness. So, there's no emotion whatsoever.” |
|  |  | “She says it's like she's emotionally flat lining. Nothing. Nothing can cause her to feel any emotion. She doesn't even feel fear. It's just literally, you know, an emotional… wasteland, that's how she feels inside.” |
| **Pointlessness / hopelessness** | Loved ones feel life is meaningless and future bleak | “That feeling of sort of pointlessness and just not getting any sense of almost like negative or positive sort of feelings from it.” |
|  |  | “She just feels everything is absolutely hopeless and nothing can get any better… everything's pointless. She can't get better. It won't get better. She feels hopeless.” |
| **Social isolation / impact on relationships** | Loved ones withdraw from social life, fear burdening others | “Don’t like attending social gatherings… they like isolating themselves from people around them… it's not about listening to music alone, but isolation.” |
|  |  | “Even avoiding social situations as well. Low motivation in even starting to carry out any tasks, feels so overwhelming to him.” |
|  |  | “He's just started dating someone, but is very hesitant… because he doesn't feel what he knows he should be feeling.” |
|  |  | “I think it's seen as they feel disconnected and, a bit like looking in the window, being outside and looking in a window and seeing everyone else enjoying themselves, but being very separate from it.” |
| **Loss of engagement / pleasure** | No longer engages in previously valued activities | “There just isn't that feeling of pleasure towards anything really.” |
|  |  | “He's in a very dark place of despair 'cause he doesn't feel that he can get pleasure from anything and hasn't done for quite a while.” |
|  |  | “She no longer likes the things that she used to do.” |
| **Variation over time** | Anhedonia patterns: episodic, persistent, worsening | “She says it comes and goes of its own will and she can't predict it… sun and warmth help and cold and winter… greyness doesn't help.” |
|  |  | “Unlike Caroline's daughter, this isn't… it's constant.” |
|  |  | “Definitely gets worse with age and with time.” |
|  |  | “Pandemic has further impact… causing even more lack of pleasure or wish to engage.” |
| **Attributed causes** | Diagnosis | “It is a known negative symptom of schizophrenia.” |
|  |  | “Suffers from anhedonia, in the context of broader depression.” |
|  | Medication | “It's a combination of the diagnosis of schizophrenia, but also a combination of the drugs.” |
|  |  | “The medication… makes her lose her concentration… she can't get pleasure out of that now.” |
|  |  | “I feel medication has had a big side effect to him… leads to no interest in activities.” |
|  | Life events | “When Abel lost his wife… it really impacted him.” |
|  |  | “My close friend was having some depression… he lost his parents in a gas motor accident.” |
|  |  | “His wife actually divorced him… he started getting depressed and other challenges.” |
|  | Low self-esteem / comparison to peers | “She can see everyone around her age getting on with things… she wants to be able to do it.” |
|  |  | “He can see how his peers are and what their lives are like. And his is very different.” |
|  |  | “I can see that he's not doing the same things that his twin brother is. His other siblings.” |
| **Practical & emotional burden** | Physical / practical demands | “Caring has a physical toll.” |
|  |  | “We can’t have breaks. We can't have holidays.” |
|  |  | “That influences the kind of things you might do together, so then your world might shrink as well.” |
|  | Emotional burden / mirroring | “You know, start feeling the same feelings… that's like sort of you… become the same.” |
|  |  | “Start finding yourself that you're not having enjoyment in things.” |
|  |  | “Not even wanting to, you know, talk with the family members.” |
|  |  | “It brings me down, brings my mood down.” |
|  | Inauthenticity / pressure to be positive | “I have to work harder at keeping my mood happy… it's pretty hard.” |
|  |  | “Quite demanding in terms of effort… makes me feel sad and doubt about myself.” |
| **Support & stigma** | Lack of service recognition | “It's maybe something almost like a quiet thing… other people don't see it as important… I can't do that on my own.” |
|  |  | “He's no longer having hallucinations and delusions… care team says, 'Oh, that's fine.' But he's not really got much of a life.” |
|  |  | “There is no help from services, especially with something like this.” |
|  |  | “My son… let down by many organisations… doctors have not done the right thing for him.” |
